# Supplementary material for: SMARCAD1 and TOPBP1 contribute to heterochromatin maintenance at the transition from the 2C-like to the pluripotent state
Source: eLife journal article supplement (doi:10.7554/elife.87742), 2023-06-06
Supplement: fig2-figsupp1-data2 [file elife-87742-fig2-figsupp1-data2-v1.zip]

## Anti-H3

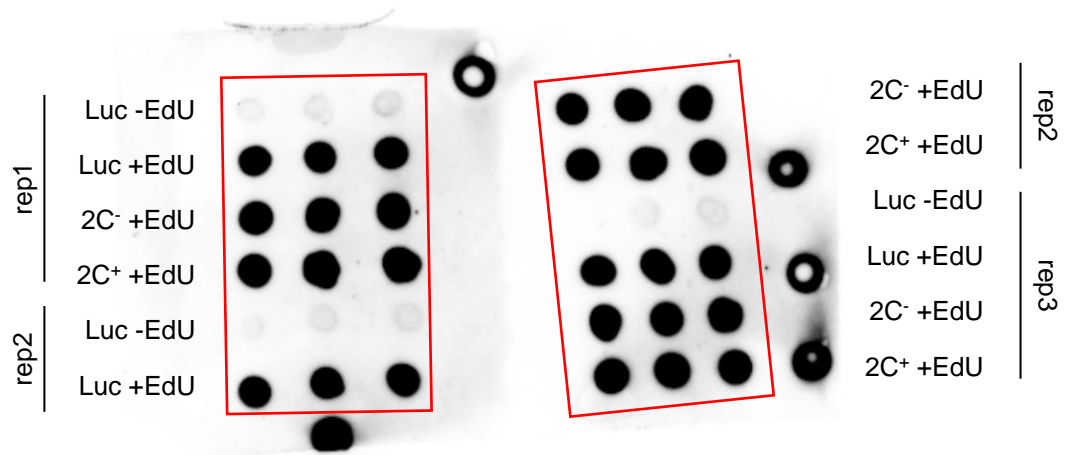

## Anti-Vinculin

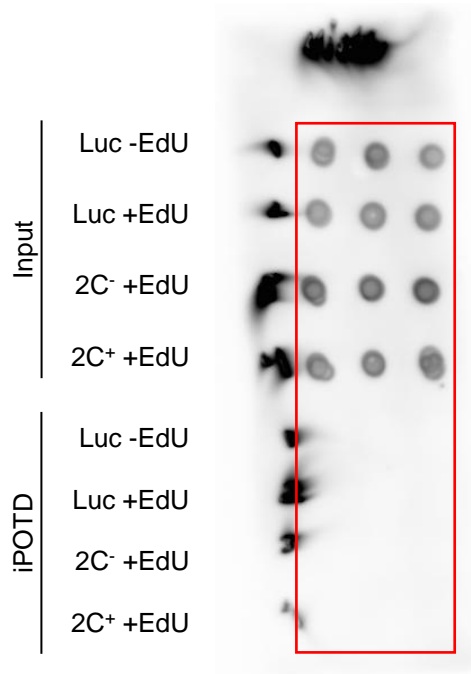

**Figure 2-figure supplement 1, Source Data 2.** Original membranes corresponding to Figure 2-figure supplement 1A. Independent DNA-mediated chromatin pull-down (iPOTD) eluates from sorted luciferase, 2C<sup>-</sup> and 2C<sup>+</sup> replicates in the absence or presence of EdU ( $\pm$ EdU) were analyzed by dot blot with an anti-H3 antibody (top). Input and eluates from equivalent preparations were incubated with an anti-vinculin antibody (bottom). Each condition was spotted in triplicates.
