# Supplementary material for: SMARCAD1 and TOPBP1 contribute to heterochromatin maintenance at the transition from the 2C-like to the pluripotent state
Source: eLife journal article supplement (doi:10.7554/elife.87742), 2023-06-06
Supplement: fig3-figsupp1-data2 [file elife-87742-fig3-figsupp1-data2-v1.zip]

Anti-Total H3

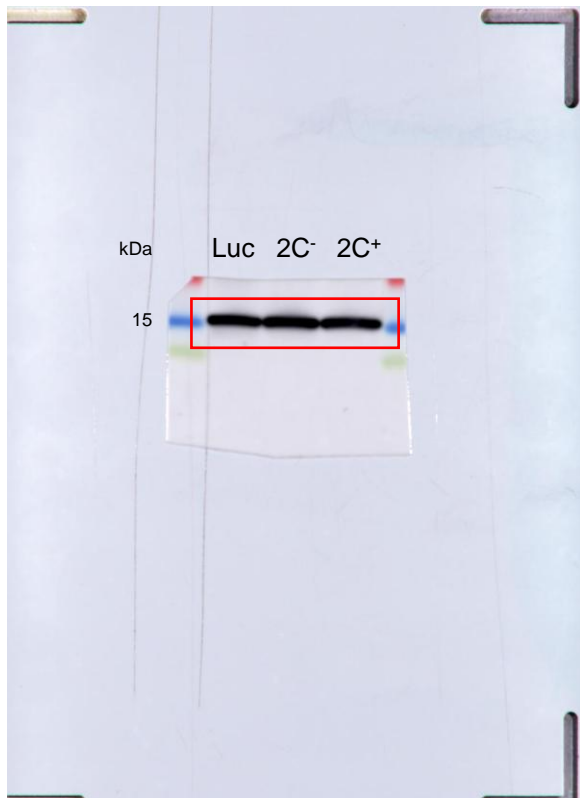

Anti-H3K9me3

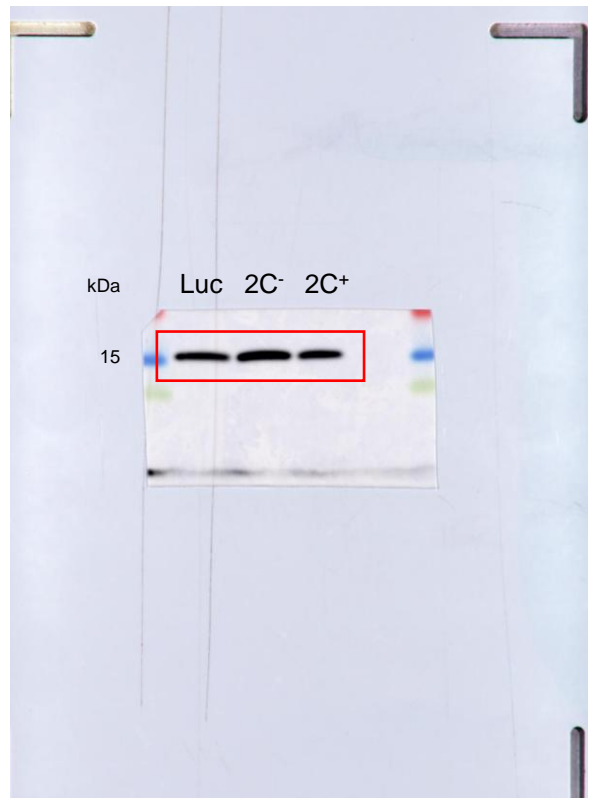

Anti-OCT4

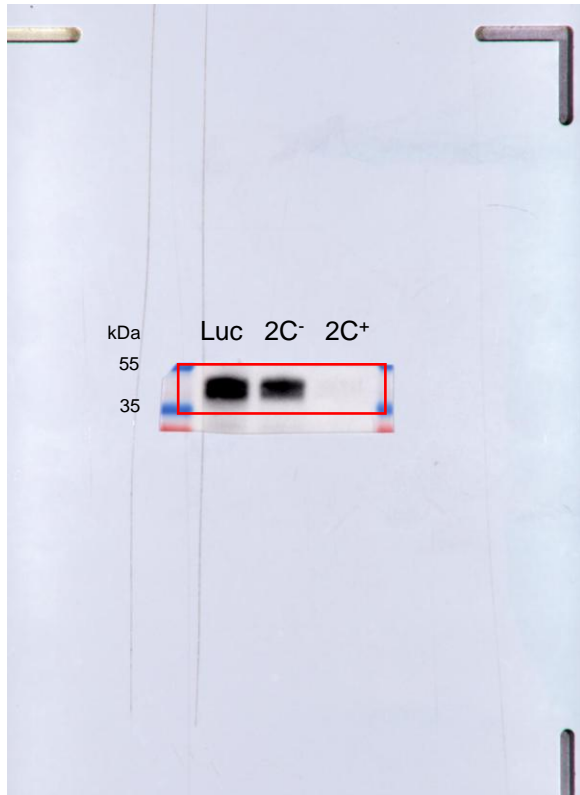

Anti-SMARCAD1

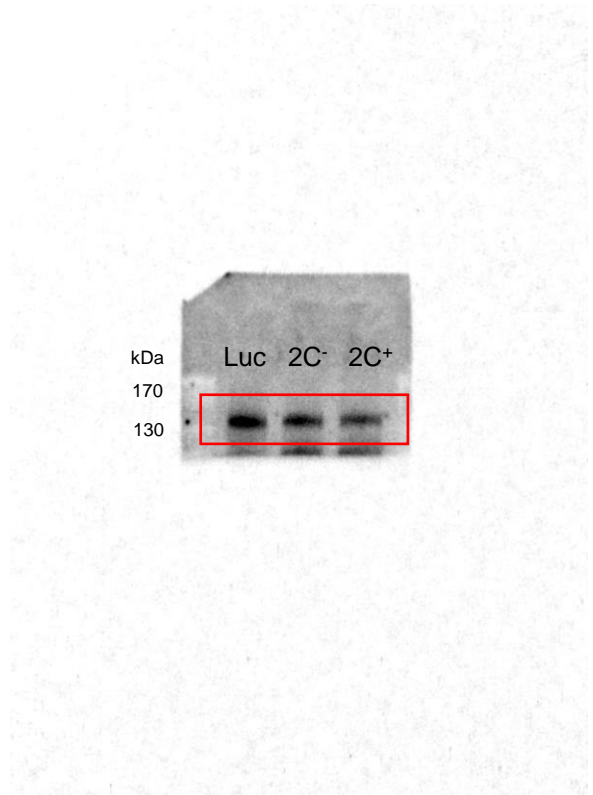

**Figure 3-figure supplement 1, Source Data 2.** Original membranes corresponding to Figure 3-figure supplement 1D. Representative Western Blots for luciferase (Luc), 2C<sup>-</sup> and 2C<sup>+</sup> cells. SMARCAD1, OCT4, H3K9me3 and total histone H3 blots are shown.
